# Supplementary material for: Phenotypic Plasticity of the Drosophila Transcriptome
Source: PLoS Genet. 2012 Mar 29;8(3):e1002593. doi: 10.1371/journal.pgen.1002593 (PMC3315458; doi:10.1371/journal.pgen.1002593)
Supplement: Table S5 — Class I phenotypically plastic transcripts associated with life span and clustered into modules using MMC (13). (XLSX) [file pgen.1002593.s013.xlsx]

## Sheet: Life span
Table S5
Class I phenotypically plastic transcripts associated with life span and clustered into modules using MMC*.
AffyID	Gene Symbol	Flybase ID	Module	Average |r|	|r|
1631620_at	GlyP	FBgn0004507	1	0.9652	0.9652
1637538_s_at	CG9485 /// DsecCG9485	FBgn0034618	1	0.9652	0.9652
1624437_s_at	AGO1 /// CG30025 /// CG30031 /// deltaTry /// gammaTry	FBgn0262739	2	0.85892	0.88894
1629313_at	CG8661	FBgn0030837	2	0.85892	0.7921
1638377_x_at	AGO1 /// CG30025 /// CG30031 /// deltaTry /// gammaTry	FBgn0262739	2	0.85892	0.89572
1623144_at	ci	FBgn0004859	3	0.66664	0.73917
1626124_at	CG9717	FBgn0039789	3	0.66664	0.62628
1626893_at	Gasp	FBgn0026077	3	0.66664	0.69181
1627656_at	grk	FBgn0001137	3	0.66664	0.66153
1630034_at	CG12119	FBgn0030102	3	0.66664	0.68001
1630083_at	Rab8	FBgn0262518	3	0.66664	0.71752
1630150_s_at	Cg25C	FBgn0000299	3	0.66664	0.72105
1632339_s_at	cher	FBgn0014141	3	0.66664	0.75052
1633935_at	skf	FBgn0262600	3	0.66664	0.78475
1635352_s_at	Vha44	FBgn0262511	3	0.66664	0.75386
1638452_at	per	FBgn0003068	3	0.66664	0.38726
1639483_s_at	Nep1	FBgn0029843	3	0.66664	0.68127
1640235_at	W	FBgn0003997	3	0.66664	0.64951
1640838_s_at	Akap200	FBgn0027932	3	0.66664	0.56003
1641390_at	dpr19	FBgn0032233	3	0.66664	0.59509
1630614_s_at	diver	FBte0000001	4	0.65948	0.65948
1641470_s_at	vg	FBgn0003975	4	0.65948	0.65948
1622912_at	Ucp4A	FBgn0030872	5	0.62967	0.60146
1623035_at	NaPi-T	FBgn0016684	5	0.62967	0.45223
1623851_at	CG9400	FBgn0030562	5	0.62967	0.61706
1626452_at	CG2121	FBgn0033289	5	0.62967	0.54045
1626700_at	Act88F	FBgn0000047	5	0.62967	0.65897
1627018_s_at	ATPsyn-gamma	FBgn0020235	5	0.62967	0.74113
1628388_at	CG3823	FBgn0029863	5	0.62967	0.6274
1631474_s_at	Gpo-1	FBgn0022160	5	0.62967	0.71152
1633673_a_at	ATPsyn-beta	FBgn0010217	5	0.62967	0.63928
1634162_at	CG40198	FBgn0058198	5	0.62967	0.61579
1634310_at	TpnC4	FBgn0033027	5	0.62967	0.65449
1634846_a_at	l(1)G0156	FBgn0027291	5	0.62967	0.70254
1635886_s_at	blood	FBte0000279	5	0.62967	0.63792
1637067_at	CG6074	FBgn0039486	5	0.62967	0.71158
1637246_a_at	CG32627	FBgn0052627	5	0.62967	0.66882
1637335_at	fln	FBgn0005633	5	0.62967	0.6533
1637826_at	CG10623	FBgn0032727	5	0.62967	0.49526
1637829_at	CG4020	FBgn0029821	5	0.62967	0.58469
1638405_at	CG9338 /// DsimCG9338	FBgn0032899	5	0.62967	0.65048
1639252_s_at	CG11876	FBgn0039635	5	0.62967	0.71931
1640907_at	Gapdh1	FBgn0001091	5	0.62967	0.73786
1640991_at	CG32091	FBgn0052091	5	0.62967	0.45894
1641169_s_at	CG11050	FBgn0031836	5	0.62967	0.6406
1641212_a_at	Fhos	FBgn0261259	5	0.62967	0.59093
1625276_a_at	Eip71CD	FBgn0000565	6	0.61622	0.59985
1635548_s_at	CG30287 /// CG34166	FBgn0050287	6	0.61622	0.6957
1641039_at	CG1397	FBgn0261277	6	0.61622	0.55312
1624273_at	CG8034	FBgn0031011	7	0.56356	0.60351
1626386_at	Cpr57A /// Obp57d	FBgn0034517	7	0.56356	0.65433
1627167_a_at	CG40485	FBgn0069973	7	0.56356	0.53269
1628197_at	CG13177	FBgn0040759	7	0.56356	0.57531
1628964_at	CG4804	FBgn0032178	7	0.56356	0.55025
1632072_at	CG34134	FBgn0083970	7	0.56356	0.29385
1632958_a_at	CG42365	FBgn0259711	7	0.56356	0.38524
1636242_at	Ilp6	FBgn0044047	7	0.56356	0.5224
1637454_a_at	Obp19a	FBgn0031109	7	0.56356	0.57083
1638630_at	CG1983	FBgn0039751	7	0.56356	0.64044
1639397_at	CG9676 /// spheroide	FBgn0030773	7	0.56356	0.68261
1640458_at	CG11211	FBgn0033067	7	0.56356	0.68524
1640906_at	CG32523 /// DsecCG32523	FBgn0052523	7	0.56356	0.6113
1641539_a_at	CG7829	FBgn0039703	7	0.56356	0.58183
1624137_at	CG11911	FBgn0031249	8	0.53603	0.65333
1624945_a_at	CG10910	FBgn0034289	8	0.53603	0.52674
1625538_at	Jon66Ci	FBgn0035886	8	0.53603	0.54722
1628500_at	CG32483	FBgn0052483	8	0.53603	0.58515
1628721_at	CG9864	FBgn0034490	8	0.53603	0.43099
1631204_at	Peritrophin-15b	FBgn0040958	8	0.53603	0.27665
1634834_at	CG4053	FBgn0038482	8	0.53603	0.5424
1636507_at	vanin-like	FBgn0040069	8	0.53603	0.61297
1636622_at	Peritrophin-15a	FBgn0040959	8	0.53603	0.53243
1637350_at	CG31086	FBgn0051086	8	0.53603	0.65243
1633432_at	CG9657	FBgn0029950	9	0.53412	0.57618
1634279_at	CG11529	FBgn0036264	9	0.53412	0.46522
1637516_at	CG15449	FBgn0031146	9	0.53412	0.60455
1637561_at	lectin-33A	FBgn0040096	9	0.53412	0.49054
1624969_s_at	CG42319	FBgn0259219	10	0.53045	0.61878
1631307_at	CG11438	FBgn0037164	10	0.53045	0.38169
1631351_s_at	CG12118	FBgn0030101	10	0.53045	0.65973
1631555_at	CG10062	FBgn0034439	10	0.53045	0.39192
1632401_at	CG15747	FBgn0030474	10	0.53045	0.43857
1633149_at	Gs1l	FBgn0019982	10	0.53045	0.50388
1633589_a_at	CG1552	FBgn0030258	10	0.53045	0.66063
1634842_a_at	CG11160	FBgn0030257	10	0.53045	0.48927
1636545_at	CheB38c	FBgn0032888	10	0.53045	0.58502
1637626_at	CG15412	FBgn0031528	10	0.53045	0.63595
1639223_a_at	sr	FBgn0003499	10	0.53045	0.28558
1639594_at	CG40485	FBgn0069973	10	0.53045	0.61985
1640845_at	CG10581	FBgn0037046	10	0.53045	0.56604
1641337_at	CG11617	FBgn0031232	10	0.53045	0.58933
1624478_at	Roc1a	FBgn0025638	11	0.52972	0.58604
1625212_at	CG4653	FBgn0030776	11	0.52972	0.62103
1626529_at	CG42337	FBgn0259239	11	0.52972	0.42566
1629875_a_at	Cyp4d1	FBgn0005670	11	0.52972	0.61168
1630302_at	CG8562	FBgn0035779	11	0.52972	0.60446
1631873_at	CG3706	FBgn0040342	11	0.52972	0.64554
1635216_at	CG1407	FBgn0033474	11	0.52972	0.35801
1637269_at	CG6310	FBgn0036121	11	0.52972	0.3853
1628405_at	CG7298	FBgn0036948	12	0.5171	0.57971
1632882_at	CG11671	FBgn0037562	12	0.5171	0.46537
1633862_at	CG12934	FBgn0033541	12	0.5171	0.53157
1637253_s_at	CG17570	FBgn0260000	12	0.5171	0.49579
1638184_at	CG13936	FBgn0035282	12	0.5171	0.51308
1626447_at	CG10508	FBgn0037060	13	0.48872	0.63349
1632386_at			13	0.48872	0.61703
1636902_at	CG1840	FBgn0030351	13	0.48872	0.55931
1638006_at	CG10211	FBgn0032685	13	0.48872	0.27202
1640181_at	CG13044	FBgn0036599	13	0.48872	0.36175
1623687_at	CG15199	FBgn0030270	14	0.47414	0.40859
1626911_at	CG6495	FBgn0027550	14	0.47414	0.44195
1627817_at	CG33109	FBgn0053109	14	0.47414	0.45107
1631274_at	CG18095	FBgn0028872	14	0.47414	0.50131
1631584_at	CG31189	FBgn0051189	14	0.47414	0.5397
1633264_at	CG13024	FBgn0036665	14	0.47414	0.2947
1633536_at	CG4630	FBgn0033809	14	0.47414	0.52786
1634180_s_at	CG9664	FBgn0031515	14	0.47414	0.4937
1637072_at	CG11459 /// DsimCG11459	FBgn0037396	14	0.47414	0.46858
1640978_at	CG14567	FBgn0037126	14	0.47414	0.61396
1630084_at	CG10205	FBgn0033970	15	0.44898	0.52112
1631098_at	CG7194	FBgn0035868	15	0.44898	0.27705
1634142_at	CG6403	FBgn0039453	15	0.44898	0.54295
1635798_a_at	CG17364	FBgn0036391	15	0.44898	0.41952
1640983_at	CG5909	FBgn0039495	15	0.44898	0.48424
1622974_at	CG4000	FBgn0038820	16	0.41819	0.55928
1623151_a_at	CG2010	FBgn0039667	16	0.41819	0.55359
1623601_at	Amyrel	FBgn0020506	16	0.41819	0.43785
1624130_at	Obp56h	FBgn0034475	16	0.41819	0.36128
1625071_a_at	Mlc2	FBgn0002773	16	0.41819	0.52291
1626908_at	CG8066	FBgn0038243	16	0.41819	0.37635
1627895_at	CG18404	FBgn0039761	16	0.41819	0.41434
1627899_at	CR41111	FBgn0085783/withdraw	16	0.41819	0.46542
1628541_at	Takl1	FBgn0046689	16	0.41819	0.15099
1628579_at	AY122114		16	0.41819	0.55926
1628617_at	dro4	FBgn0052282	16	0.41819	0.41431
1628830_at	ver	FBgn0262524	16	0.41819	0.46185
1628896_a_at	CG4210	FBgn0038302	16	0.41819	0.33607
1629317_at	Nplp3	FBgn0042201	16	0.41819	0.49667
1630299_at	CG17325 /// CG42305	FBgn0040993	16	0.41819	0.46666
1630589_at	CG17734	FBgn0037890	16	0.41819	0.50584
1630612_at	CG17636	FBgn0025837	16	0.41819	0.42032
1630700_at	CG43064	FBgn0262366	16	0.41819	0.34905
1630948_s_at	Doc3-element	FBte0001140	16	0.41819	0.31348
1631145_at	CG32073	FBgn0052073	16	0.41819	0.22796
1631468_a_at	tim	FBgn0014396	16	0.41819	0.32651
1632362_at	CG13616	FBgn0039200	16	0.41819	0.52261
1633631_at	CG9682	FBgn0039760	16	0.41819	0.38869
1636028_at	CG6723	FBgn0037895	16	0.41819	0.35269
1636493_at	dei	FBgn0008649	16	0.41819	0.22244
1637057_at	nrm	FBgn0262509	16	0.41819	0.51875
1637195_at	CG31321	FBgn0051321	16	0.41819	0.45179
1638023_s_at	CG14880	FBgn0038422	16	0.41819	0.19491
1638049_at	CG30494	FBgn0027604	16	0.41819	0.19872
1638472_at	Cpr62Bb	FBgn0035280	16	0.41819	0.55111
1638763_at	Fhos	FBgn0261259	16	0.41819	0.54364
1640057_at	CG9192	FBgn0035193	16	0.41819	0.18318
1640107_at	obst-A	FBgn0031097	16	0.41819	0.51179
1640736_at	b	FBgn0000153	16	0.41819	0.50947
1640809_at	CG12105	FBgn0035241	16	0.41819	0.58057
1641245_a_at	CG40115	FBgn0058115	16	0.41819	0.46195
1641325_s_at	Tm2	FBgn0004117	16	0.41819	0.56061
1623484_at	vg	FBgn0003975	17	0.41693	0.26644
1625401_at	CG13026	FBgn0036656	17	0.41693	0.5224
1626740_at	Cpr72Ec	FBgn0036619	17	0.41693	0.30143
1629919_at	Cpr100A	FBgn0039805	17	0.41693	0.54926
1630085_s_at	Peritrophin-A	FBgn0022770	17	0.41693	0.44223
1631280_at	CG9095	FBgn0030617	17	0.41693	0.42815
1631302_at	CG16885	FBgn0032538	17	0.41693	0.48779
1633411_s_at	CG12546 /// CG14452	FBgn0037178	17	0.41693	0.20527
1635072_at	CG7214	FBgn0031940	17	0.41693	0.56423
1635226_at	lox2	FBgn0034660	17	0.41693	0.43905
1637103_at	CG9640	FBgn0034182	17	0.41693	0.53322
1638687_at	CG40298	FBgn0058298	17	0.41693	0.33742
1638716_a_at	CG10725	FBgn0036362	17	0.41693	0.49595
1639351_at	Cpr97Eb	FBgn0039481	17	0.41693	0.31803
1639983_at	CG34290	FBgn0085319	17	0.41693	0.27874
1641474_s_at	Acp1 /// CG13796	FBgn0014454	17	0.41693	0.50136
1623757_at	Cry	FBgn0005664	18	0.40135	0.45664
1626377_at	CG8358	FBgn0037727	18	0.40135	0.45946
1627312_at	RpL12	FBgn0034968	18	0.40135	0.34407
1632639_at	Arc2	FBgn0033928	18	0.40135	0.34916
1635343_a_at	CkIIalpha-i3	FBgn0025676	18	0.40135	0.16441
1637548_at	arg	FBgn0023535	18	0.40135	0.57706
1640224_s_at	CG13796	FBgn0031939	18	0.40135	0.43016
1641268_at	CG13313	FBgn0035941	18	0.40135	0.4431
1641741_a_at	CG14823	FBgn0035734	18	0.40135	0.38809
*Stone EA & Ayroles JF (2009) Modulated modularity clustering as an exploratory tool for functional genomic inference. PLoS Genet 5: e1000479.
